# Supplementary material
Source: publisher figshare collection journal article supplement (https://gsajournals.figshare.com/articles/dataset/_/8335217)
Supplement: Supplementary file 1 [file 1]

**Table S1. Putative sugar and glycerol transporters.** Putative sugar porters were identified by Lazar et al. (2017) and a phylogenetic analysis revealed clustering in six groups (Class A-F). The authors suggested that *Yarrowia Hexose Transporter* (YHT) 1-6 are the main hexose transporters in *Y. lipolytica*. Additionally, orthologs to *S. cerevisiae* aquaglyceroporin (Fps1), as revealed by blast searches (Table S2), are shown. YALI1 and YALI0 gene identifiers are provided.

| Yali1 ID      | Yali0 ID     | Function         | Comment*             |
|---------------|--------------|------------------|----------------------|
| YALI1_F25587g | YALI0F19184  | Sugar porter     | Class A, <b>YHT3</b> |
| YALI1_C08523g | YALI0C06424  | Sugar porter     | Class B, <b>YHT1</b> |
| YALI1_C12220g | YALI0C08943  | Sugar porter     | Class B, <b>YHT2</b> |
| YALI1_B27645g | YALI0B21230  | Sugar porter     | Class C              |
| YALI1_D00094g | YALI0D00132  | Sugar porter     | Class C              |
| YALI1_F24031g | YALI0F18084  | Sugar porter     | Class C              |
| YALI1_F31381g | YALI0F23903  | Sugar porter     | Class C              |
| YALI1_A02335g | YALI0A01958  | Sugar porter     | Class D              |
| YALI1_A14024g | YALI0A14212  | Sugar porter     | Class D              |
| YALI1_B00357g | YALI0B00396  | Sugar porter     | Class D              |
| YALI1_D00376g | YALI0D00363  | Sugar porter     | Class D              |
| YALI1_D23885g | YALI0D18876  | Sugar porter     | Class D              |
| YALI1_E24245g | YALI0E20427  | Sugar porter     | Class D              |
| YALI1_A08672g | YALI0A08998  | Sugar porter     | Class E              |
| YALI1_B22321g | YALI0B17138  | Sugar porter     | Class E              |
| YALI1_C06222g | YALI0C04730  | Sugar porter     | Class E              |
| YALI1_C23601g | YALI0C16522  | Sugar porter     | Class E              |
| YALI1_D01234g | YALI0D01111  | Sugar porter     | Class E              |
| YALI1_F09965g | YALI0F06776  | Sugar porter     | Class E              |
| YALI1_F32841g | YALI0F25553  | Sugar porter     | Class E              |
| YALI1_B02283g | YALI0B01342  | Sugar porter     | Class F, <b>YHT5</b> |
| YALI1_B08461g | YALI0B06391  | Sugar porter     | Class F, <b>YHT6</b> |
| YALI1_E27441g | YALI0E23287  | Sugar porter     | Class F, <b>YHT4</b> |
| YALI1_A11557g | YALI0A11550  | Sugar porter     | pseudogene           |
| YALI1_C06191g | YALI0C04686  | Sugar porter     | pseudogene           |
| YALI1_C14843g | YALI0C10560  | Sugar porter     | Pseudogene           |
| YALI1_F00616g | YALI0F00462g | Aquaglyceroporin | <i>FPS1</i> homolog  |
| YALI1_E06664g | YALI0E05665g | Aquaglyceroporin | <i>FPS1</i> homolog  |
