# Supplementary material
Source: publisher figshare collection journal article supplement (https://gsajournals.figshare.com/articles/dataset/_/8335217)
Supplement: Supplementary file 3 [file 1]

**Table S2. Glycerol metabolic genes.** Blastp search (protein-protein BLAST) for the identification of *Y. lipolytica* glycerol metabolic genes using orthologs of *S. cerevisiae*.

| Pathway                    | Function                                     | <i>S. cerevisiae</i><br>Standard Name | <i>S. cerevisiae</i><br>Systematic Name | EC number | % identity | E value   | YALI1 ID      | YALIO ID      |
|----------------------------|----------------------------------------------|---------------------------------------|-----------------------------------------|-----------|------------|-----------|---------------|---------------|
| <b>G3P<br/>pathway</b>     | Glycerol Kinase                              | GUT1                                  | YHL032C                                 | 2.7.1.30  | 43         | 4.76E-139 | YALI1_F00654g | YALIO_F00484g |
|                            | G-3-P dehydrogenase (FAD <sup>+</sup> )      | GUT2                                  | YIL155C                                 | 1.1.5.3   | 46         | 0.0       | YALI1_B18499g | YALIO_B13970g |
|                            | G-3-P dehydrogenase (NAD <sup>+</sup> )      | GPD1 / GPD2                           | YDL022W / YOL059W                       | 1.1.1.8   | 58         | 1.85E-156 | YALI1_B04433g | YALIO_B02948g |
|                            | Glycerol-3-phosphatase                       | GPP1 / GPP2                           | YIL053W / YER062C                       | 3.1.3.21  |            |           | NA            | NA            |
| <b>DHA<br/>pathway</b>     | Dihydroxyacetone kinase                      | DAK1 / DAK2                           | YML070W / YFL053W                       | 2.7.1.29  | 42         | 3.72E-139 | YALI1_F12917g | YALIO_F09273g |
|                            |                                              |                                       |                                         |           | 41         | 2.00E-135 | YALI1_E24532g | YALIO_E20691g |
|                            |                                              |                                       |                                         |           | 37         | 2.49E-126 | YALI1_F02508g | YALIO_F01606g |
|                            |                                              |                                       |                                         |           | 50         | 2.16E-91  | YALI1_B09211g | YALIO_B07117g |
|                            | Glycerol Dehydrogenase (NADP <sup>+</sup> )  | GCY1/YPR1                             | YOR120W/YDR368W                         | 1.1.1.156 | 49         | 1.56E-90  | YALI1_B28394g | YALIO_B21780g |
|                            |                                              |                                       |                                         |           | 49         | 6.50E-90  | YALI1_D05111g | YALIO_D04092g |
|                            |                                              |                                       |                                         |           | 49         | 6.93E-90  | YALI1_E22041g | YALIO_E18348g |
|                            |                                              |                                       |                                         |           | 49         | 2.70E-89  | YALI1_A15863g | YALIO_A15906g |
|                            |                                              |                                       |                                         |           | 45         | 7.92E-73  | YALI1_F24773g | YALIO_F18590g |
|                            | Arabinose dehydrogenase (NADP <sup>+</sup> ) | ARA1                                  | YBR149W                                 | 1.1.1.117 | 44         | 1.71E-73  | YALI1_C18771g | YALIO_C13508g |
|                            |                                              |                                       |                                         |           | 41         | 1.95E-65  | YALI1_C12619g | YALIO_C09119g |
|                            |                                              |                                       |                                         |           | 43         | 4.79E-65  | YALI1_F10224g | YALIO_F06974g |
|                            | Aldose reductase (NAD(P) <sup>+</sup> )      | GRE3                                  | YHR104W                                 | 1.1.1.21  | 31         | 1.56E-33  | YALI1_D09870g | YALIO_D07634g |
| <b>Glycerol<br/>uptake</b> | Aquaglyceroporin                             | FPS1                                  | YLL043W                                 |           | 34         | 0.00      | YALI1_F00616g | YALIO_F00462g |
|                            |                                              |                                       |                                         |           | 35         | 0.00      | YALI1_E06664g | YALIO_E05665g |
