# Supplementary material
Source: publisher figshare collection journal article supplement (https://gsajournals.figshare.com/articles/dataset/_/8335217)
Supplement: Supplementary file 4 [file 1]

**A**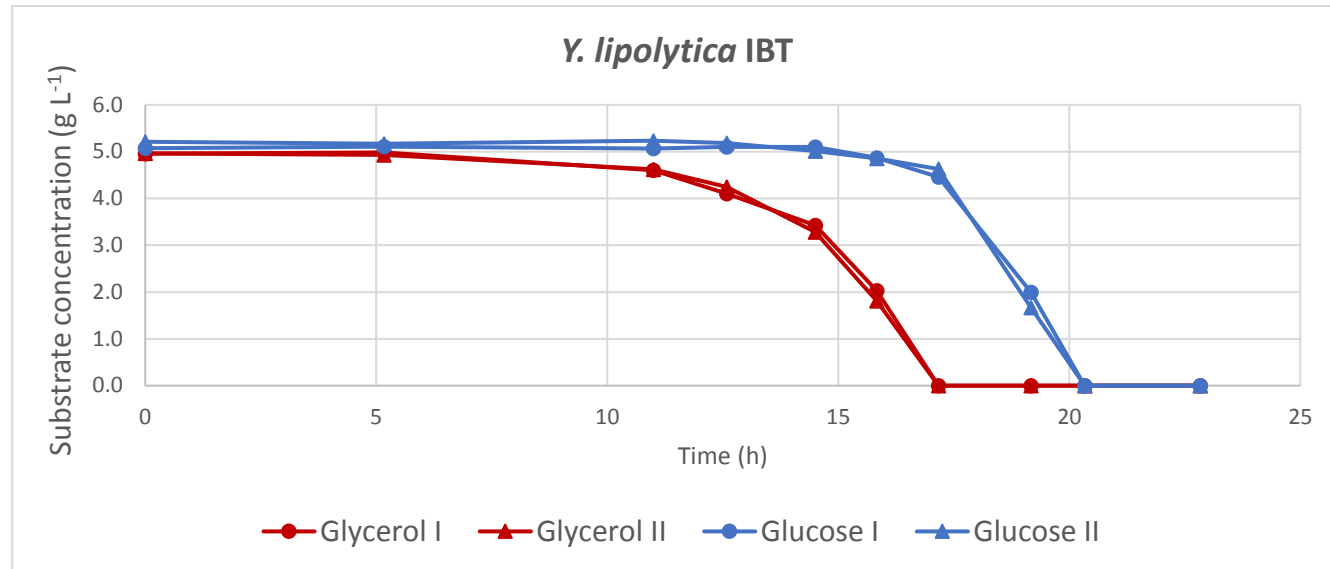**B**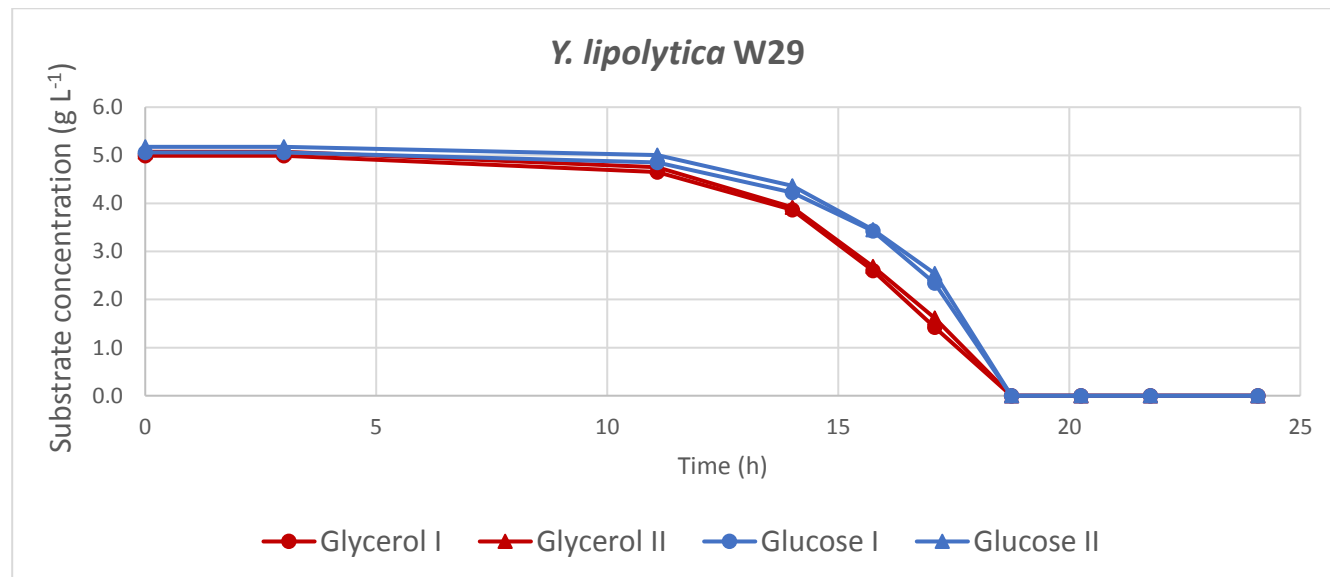

**Figure S1.** Substrate consumption of *Y. lipolytica* strains IBT and W29 during shake flask cultivations. Minimal media supplemented with  $5 \text{ g L}^{-1}$  glycerol and  $5 \text{ g L}^{-1}$  glucose was used. Experiments have been conducted in duplicates and profiles of both replicates are shown. IBT showed a sequential carbon utilization (A) while W29 exhibited a higher degree of co-consumption (B).
